# Supplementary material for: Effects of moderate physical activity on diabetic adhesive capsulitis: a randomized clinical trial
Source: PeerJ. 2024 Sep 18;12:e18030. doi: 10.7717/peerj.18030 (PMC11416079; doi:10.7717/peerj.18030)
Supplement: Supplemental Information 1 [file peerj-12-18030-s001.xlsx]

## Sheet: Data Set
Sr.No	Group	Age	Gender	HODM_Yr	DMstatus	Management	Comorbidities	Walk_Exercise	BMI	BMICat	ShoulderPainDuration	Pain_Side	Pain_Type	HbA1CBaseline	HbA1CPost6thW	NPRS0	NPRSW1	NPRSW2	NPRSW3	NPRSW4	NPRSW5	NPRSW6	ROMShoulderAbd0	ROMShoulderAbd1	ROMShoulderAbd2	ROMShoulderAbd3	ROMShoulderAbd4	ROMShoulderAbd5	ROMShoulderAbd6	ROMShoulderER0	ROMShoulderER1	ROMShoulderER2	ROMShoulderER3	ROMShoulderER4	ROMShoulderER5	ROMShoulderER6	ROMShoulderIR0	ROMShoulderIR1	ROMShoulderIR2	ROMShoulderIR3	ROMShoulderIR4	ROMShoulderIR5	ROMShoulderIR6	DASH1Baseline	DASH1W1	DASH1W2	DASH1W3	DASH1W4	DASH1W5
7	Experimental Group	57	Female	9	Uncontrolled	Medication	Yes	No	26.4	25-29.9 (Overweight)	60	Left	Intermittent Sharp	10.2	10.2	7	6	6	5	4	4	2	65	68	74	85	99	108	125	20	25	37	40	48	56	63	40	42	51	63	71	73	80	Severe Difficulty	Severe Difficulty	Moderate Difficulty	Moderate Difficulty	Mild Difficulty	Mild Difficulty
11	Experimental Group	44	Male	3	Uncontrolled	Medication	No	No	28	25-29.9 (Overweight)	30	Left	Intermittent Sharp	12.9	12.9	8	7	6	6	5	3	2	43	57	78	102	122	136	141	21	26	32	34	39	46	62	45	49	54	61	67	70	70	Severe Difficulty	Severe Difficulty	Moderate Difficulty	Moderate Difficulty	Mild Difficulty	Mild Difficulty
8	Experimental Group	40	Female	2	Uncontrolled	Medication	No	No	25	25-29.9 (Overweight)	20	Left	Intermittent Sharp	13.8	13.1	8	7	7	6	5	3	3	40	56	77	98	126	132	139	20	22	29	35	37	44	59	43	48	53	59	64	69	71	Severe Difficulty	Severe Difficulty	Moderate Difficulty	Moderate Difficulty	Mild Difficulty	Mild Difficulty
26	Experimental Group	53	Female	5	Uncontrolled	Medication	Yes	No	26.8	25-29.9 (Overweight)	60	Left	Intermittent Sharp	10.5	10.1	7	7	6	5	4	3	2	85	88	94	95	103	118	137	24	27	36	41	48	57	62	43	43	52	64	71	76	80	Severe Difficulty	Severe Difficulty	Moderate Difficulty	Moderate Difficulty	Mild Difficulty	Mild Difficulty
4	Experimental Group	42	Female	5	Uncontrolled	Medication	Yes	No	26.2	25-29.9 (Overweight)	30	Left	Intermittent Dull	7.7	7.5	6	6	5	4	3	2	2	105	111	119	132	135	141	142	27	31	38	49	55	61	69	65	68	71	77	80	83	84	Severe Difficulty	Severe Difficulty	Moderate Difficulty	Moderate Difficulty	Mild Difficulty	Mild Difficulty
35	Control Group	58	Female	5	Uncontrolled	Insulin	Yes	No	28.3	25-29.9 (Overweight)	60	Left	Intermittent Sharp	13.7	13.2	7	7	6	5	5	4	3	110	116	120	125	129	139	139	33	36	37	44	47	48	53	59	63	67	73	75	80	82	Moderate Difficulty	Moderate Difficulty	Moderate Difficulty	Mild Difficulty	Mild Difficulty	Mild Difficulty
10	Control Group	49	Female	6	Uncontrolled	Medication	No	No	26	25-29.9 (Overweight)	120	Left	Intermittent Sharp	8	8	7	6	6	5	4	4	3	86	91	110	117	121	137	138	23	28	34	44	47	53	59	49	52	55	63	66	66	73	Severe Difficulty	Severe Difficulty	Severe Difficulty	Moderate Difficulty	Moderate Difficulty	Moderate Difficulty
21	Control Group	59	Female	8	Uncontrolled	Medication	No	No	26.8	25-29.9 (Overweight)	20	Left	Intermittent Sharp	11.4	11.3	8	7	7	6	5	5	4	86	91	110	115	122	127	134	26	29	34	40	49	55	58	47	52	55	61	65	66	72	Severe Difficulty	Severe Difficulty	Severe Difficulty	Moderate Difficulty	Moderate Difficulty	Moderate Difficulty
38	Control Group	50	Female	6	Uncontrolled	Medication	No	No	27	25-29.9 (Overweight)	10	Left	Intermittent Sharp	11.4	11.3	8	7	7	6	5	5	4	86	94	111	118	128	131	136	25	27	36	39	41	52	55	50	53	54	59	65	70	72	Severe Difficulty	Severe Difficulty	Severe Difficulty	Moderate Difficulty	Moderate Difficulty	Moderate Difficulty
39	Experimental Group	53	Female	8	Uncontrolled	Medication	No	Yes	27.9	25-29.9 (Overweight)	40	Left	Intermittent Sharp	12.1	12	6	5	5	3	2	2	1	93	98	99	123	130	133	145	24	24	28	43	61	68	69	53	54	56	64	80	86	90	Moderate Difficulty	Moderate Difficulty	Moderate Difficulty	Moderate Difficulty	Mild Difficulty	Mild Difficulty
1	Experimental Group	58	Female	7	Uncontrolled	Medication	No	Yes	27.3	25-29.9 (Overweight)	25	Left	Intermittent Sharp	11.8	11.7	6	5	5	3	2	1	1	90	92	99	123	130	133	145	20	20	25	40	65	66	68	51	54	55	63	79	85	90	Moderate Difficulty	Moderate Difficulty	Moderate Difficulty	Moderate Difficulty	Mild Difficulty	Mild Difficulty
30	Experimental Group	53	Female	3	Controlled	Medication	Yes	No	27	25-29.9 (Overweight)	180	Right	Intermittent Sharp	9.5	9	7	7	6	5	4	2	2	100	103	115	124	129	133	137	35	35	39	43	50	64	70	49	52	60	65	67	71	79	Moderate Difficulty	Moderate Difficulty	Mild Difficulty	Mild Difficulty	Mild Difficulty	Mild Difficulty
44	Experimental Group	58	Male	5	Controlled	Medication	Yes	Yes	26.9	25-29.9 (Overweight)	25	Right	Intermittent Sharp	7.3	7.1	6	5	5	4	2	2	1	104	115	124	130	135	139	142	42	45	53	58	61	69	76	53	56	60	64	67	74	81	Moderate Difficulty	Moderate Difficulty	Mild Difficulty	Mild Difficulty	Mild Difficulty	Mild Difficulty
20	Experimental Group	57	Female	6	Controlled	Medication	Yes	Yes	26.9	25-29.9 (Overweight)	30	Left	Intermittent Sharp	7.6	7.4	6	5	5	4	3	2	1	105	115	123	129	136	140	142	43	44	53	57	60	70	76	54	57	60	67	70	76	81	Moderate Difficulty	Moderate Difficulty	Moderate Difficulty	Mild Difficulty	Mild Difficulty	Mild Difficulty
3	Control Group	49	Female	4	Uncontrolled	Insulin	Yes	No	25.5	25-29.9 (Overweight)	60	Left	Intermittent Sharp	15.2	15	7	7	6	6	5	4	4	110	112	117	125	129	133	138	22	24	27	33	39	46	51	58	61	64	69	73	78	81	Moderate Difficulty	Moderate Difficulty	Moderate Difficulty	Moderate Difficulty	Mild Difficulty	Mild Difficulty
34	Experimental Group	46	Female	2	Uncontrolled	Medication	Yes	No	25.7	25-29.9 (Overweight)	10	Left	Intermittent Dull	8	7.7	6	5	5	4	3	2	2	110	121	125	134	138	140	143	50	53	59	68	73	81	79	64	68	73	80	80	83	87	Severe Difficulty	Severe Difficulty	Moderate Difficulty	Moderate Difficulty	Mild Difficulty	Mild Difficulty
25	Experimental Group	47	Female	8	Uncontrolled	Medication	Yes	No	25.1	25-29.9 (Overweight)	40	Left	Intermittent Dull	8.7	8.3	6	5	5	4	3	2	2	105	119	122	134	138	140	143	36	38	44	53	69	72	79	64	68	71	78	80	83	86	Unable	Severe Difficulty	Moderate Difficulty	Moderate Difficulty	Mild Difficulty	Mild Difficulty
36	Experimental Group	53	Female	7	Uncontrolled	Medication	Yes	No	26	25-29.9 (Overweight)	30	Left	Intermittent Sharp	8.4	8.9	7	7	6	5	4	2	2	100	110	115	129	131	133	140	34	35	41	49	55	69	70	44	52	62	65	70	75	79	Severe Difficulty	Moderate Difficulty	Moderate Difficulty	Mild Difficulty	Mild Difficulty	Mild Difficulty
22	Experimental Group	53	Female	5	Uncontrolled	Medication	No	Yes	25.4	25-29.9 (Overweight)	30	Left	Intermittent Sharp	13.3	13	7	6	5	5	3	2	2	99	103	122	123	134	138	145	20	23	25	43	65	69	71	53	54	57	65	83	85	91	Severe Difficulty	Severe Difficulty	Moderate Difficulty	Moderate Difficulty	Mild Difficulty	Mild Difficulty
37	Experimental Group	57	Female	3	Uncontrolled	Medication	No	No	29	25-29.9 (Overweight)	90	Left	Intermittent Sharp	9	9	8	8	7	5	5	4	3	98	100	105	127	136	140	143	30	32	40	42	56	61	68	49	55	59	66	74	79	80	Unable	Severe Difficulty	Severe Difficulty	Severe Difficulty	Moderate Difficulty	Moderate Difficulty
42	Control Group	52	Female	6	Controlled	Medication	No	No	27.7	25-29.9 (Overweight)	90	Left	Intermittent Dull	7.2	7.2	7	6	6	5	5	4	4	110	114	121	129	136	139	142	31	38	47	48	53	56	67	56	60	67	67	72	79	83	Severe Difficulty	Severe Difficulty	Severe Difficulty	Moderate Difficulty	Moderate Difficulty	Mild Difficulty
31	Experimental Group	55	Female	6	Controlled	Medication	No	No	26.3	25-29.9 (Overweight)	90	Left	Intermittent Sharp	15.4	15.1	8	8	7	5	5	4	3	96	97	109	121	133	137	142	27	32	38	42	50	56	68	48	53	57	62	69	78	80	Unable	Unable	Severe Difficulty	Severe Difficulty	Moderate Difficulty	Moderate Difficulty
32	Experimental Group	49	Female	1	Uncontrolled	Medication	Yes	No	25.5	25-29.9 (Overweight)	15	Left	Intermittent Sharp	10.2	10	8	7	7	6	5	5	3	102	113	127	136	139	145	148	33	35	46	49	50	57	71	45	49	58	64	72	79	83	Severe Difficulty	Severe Difficulty	Moderate Difficulty	Moderate Difficulty	Mild Difficulty	Mild Difficulty
15	Experimental Group	43	Female	1	Uncontrolled	Medication	No	No	25.3	25-29.9 (Overweight)	30	Left	Intermittent Dull	9.9	9.9	8	7	7	6	5	4	3	104	116	121	128	133	139	143	35	38	46	57	69	74	78	52	58	63	69	74	77	82	Severe Difficulty	Severe Difficulty	Moderate Difficulty	Moderate Difficulty	Moderate Difficulty	Mild Difficulty
29	Control Group	58	Male	6	Uncontrolled	Medication	Yes	No	29	25-29.9 (Overweight)	60	Left	Intermittent Sharp	14.2	14.4	8	8	7	7	6	5	4	85	92	98	111	120	131	136	24	29	35	41	48	60	67	40	43	56	59	62	78	78	Severe Difficulty	Severe Difficulty	Severe Difficulty	Severe Difficulty	Moderate Difficulty	Moderate Difficulty
17	Experimental Group	56	Male	2	Uncontrolled	Medication	Yes	No	28	25-29.9 (Overweight)	30	Left	Intermittent Sharp	11	11	8	8	7	6	5	5	3	102	105	112	122	129	131	142	29	33	40	48	55	61	73	53	58	64	68	71	75	86	Unable	Severe Difficulty	Severe Difficulty	Moderate Difficulty	Moderate Difficulty	Mild Difficulty
9	Control Group	51	Female	5	Uncontrolled	Medication	Yes	No	28	25-29.9 (Overweight)	30	Left	Intermittent Sharp	12.3	12.3	8	8	7	7	6	5	4	91	96	103	115	125	129	136	29	31	35	42	48	60	68	40	43	56	60	62	78	79	Severe Difficulty	Severe Difficulty	Severe Difficulty	Severe Difficulty	Moderate Difficulty	Moderate Difficulty
28	Experimental Group	46	Female	2	Uncontrolled	Medication	No	No	26.4	25-29.9 (Overweight)	20	Left	Intermittent Dull	7.9	7.4	8	7	7	6	5	4	3	105	108	114	122	131	142	144	34	37	43	52	66	73	78	52	58	63	69	73	76	83	Severe Difficulty	Severe Difficulty	Moderate Difficulty	Moderate Difficulty	Moderate Difficulty	Mild Difficulty
43	Control Group	45	Female	2	Controlled	Medication	No	No	25.2	25-29.9 (Overweight)	30	Left	Intermittent Sharp	8.6	8.6	7	6	6	5	5	5	4	102	110	122	125	134	135	135	38	41	44	53	54	57	61	47	53	58	66	69	71	76	Severe Difficulty	Severe Difficulty	Severe Difficulty	Moderate Difficulty	Moderate Difficulty	Moderate Difficulty
33	Experimental Group	55	Male	3	Uncontrolled	Medication	Yes	No	28.9	25-29.9 (Overweight)	20	Left	Intermittent Sharp	12.9	12.2	8	8	7	6	5	5	3	104	109	118	123	132	136	145	31	34	42	53	56	63	75	53	59	65	68	74	81	86	Severe Difficulty	Severe Difficulty	Severe Difficulty	Moderate Difficulty	Moderate Difficulty	Mild Difficulty
24	Control Group	52	Female	6	Controlled	Medication	No	No	27.7	25-29.9 (Overweight)	90	Left	Intermittent Dull	7.2	6.9	7	6	6	5	5	4	4	110	117	122	128	137	139	141	33	39	46	47	54	55	56	56	60	68	69	73	80	83	Unable	Severe Difficulty	Severe Difficulty	Moderate Difficulty	Moderate Difficulty	Mild Difficulty
19	Control Group	48	Male	3	Controlled	Medication	No	No	25.2	25-29.9 (Overweight)	25	Right	Intermittent Sharp	8.9	8.9	7	6	6	5	5	5	4	101	111	121	124	130	135	136	39	42	45	42	55	58	62	48	53	56	64	69	73	76	Severe Difficulty	Severe Difficulty	Severe Difficulty	Moderate Difficulty	Moderate Difficulty	Moderate Difficulty
6	Experimental Group	50	Female	6	Uncontrolled	Medication	No	No	25.1	25-29.9 (Overweight)	180	Left	Continuous Dull	7.3	7.1	9	8	8	7	5	4	3	90	94	107	119	125	136	139	14	17	24	31	39	43	57	45	50	54	59	66	72	79	Unable	Unable	Severe Difficulty	Severe Difficulty	Moderate Difficulty	Moderate Difficulty
23	Control Group	60	Female	10	Uncontrolled	Both	Yes	No	29.4	25-29.9 (Overweight)	60	Left	Intermittent Sharp	8.4	8.4	8	8	7	7	6	6	4	84	86	90	97	116	122	123	25	28	33	39	44	53	54	40	43	49	58	60	68	74	Unable	Severe Difficulty	Severe Difficulty	Severe Difficulty	Moderate Difficulty	Moderate Difficulty
41	Control Group	60	Female	15	Uncontrolled	Both	Yes	No	28.9	25-29.9 (Overweight)	30	Left	Intermittent Sharp	14.4	14.5	8	8	7	7	6	6	5	84	87	91	98	111	123	125	23	26	32	38	44	49	53	40	45	49	54	59	68	71	Unable	Severe Difficulty	Severe Difficulty	Severe Difficulty	Moderate Difficulty	Moderate Difficulty
13	Control Group	53	Female	1	Uncontrolled	Insulin	Yes	No	27.9	25-29.9 (Overweight)	40	Left	Intermittent Sharp	13	13	7	6	6	6	5	5	4	108	110	115	124	129	135	140	33	34	39	44	48	53	56	42	47	51	55	64	69	74	Unable	Severe Difficulty	Severe Difficulty	Moderate Difficulty	Moderate Difficulty	Moderate Difficulty
27	Control Group	59	Female	10	Uncontrolled	Insulin	Yes	No	29.6	25-29.9 (Overweight)	21	Left	Intermittent Sharp	9.3	9.3	7	7	6	6	6	5	4	100	109	112	119	126	122	129	22	26	29	35	38	40	43	55	57	59	61	62	63	63	Unable	Unable	Unable	Severe Difficulty	Severe Difficulty	Severe Difficulty
2	Control Group	53	Female	12	Uncontrolled	Both	Yes	No	29.4	25-29.9 (Overweight)	21	Left	Intermittent Sharp	8.8	8.8	7	7	7	6	6	5	5	100	105	112	113	113	117	120	19	19	20	24	32	39	45	55	57	59	61	62	63	63	Unable	Unable	Unable	Severe Difficulty	Severe Difficulty	Severe Difficulty
14	Control Group	59	Female	11	Uncontrolled	Both	Yes	No	28.8	25-29.9 (Overweight)	20	Right	Intermittent Sharp	8.6	8.6	8	7	7	6	6	5	4	103	109	110	112	118	118	126	19	21	23	28	33	38	45	55	57	60	61	62	64	65	Unable	Unable	Unable	Severe Difficulty	Severe Difficulty	Severe Difficulty
18	Control Group	49	Female	3	Uncontrolled	Medication	No	No	27	25-29.9 (Overweight)	60	Left	Intermittent Sharp	9	9	7	7	6	6	6	5	4	109	114	119	121	127	139	140	34	39	42	49	57	58	61	44	45	53	59	64	70	76	Unable	Severe Difficulty	Severe Difficulty	Moderate Difficulty	Moderate Difficulty	Moderate Difficulty
12	Control Group	58	Female	5	Uncontrolled	Medication	No	No	26	25-29.9 (Overweight)	60	Left	Intermittent Sharp	10.7	10.7	7	7	6	6	6	5	4	100	105	109	120	127	134	138	30	34	41	49	52	58	63	44	49	52	56	63	68	72	Unable	Severe Difficulty	Severe Difficulty	Moderate Difficulty	Moderate Difficulty	Moderate Difficulty
40	Control Group	44	Female	5	Uncontrolled	Medication	No	No	26	25-29.9 (Overweight)	60	Left	Intermittent Sharp	11.4	11.4	7	7	6	6	6	5	4	101	109	114	128	130	135	139	33	39	42	53	54	60	64	47	53	58	59	65	70	75	Unable	Severe Difficulty	Severe Difficulty	Moderate Difficulty	Moderate Difficulty	Moderate Difficulty
5	Control Group	52	Female	9	Uncontrolled	Medication	Yes	No	35.5	?30	210	Right	Continuous Sharp	10.9	10.9	8	7	7	5	4	2	2	97	104	110	120	131	139	146	16	22	34	43	59	69	80	38	49	58	64	72	79	85	Unable	Severe Difficulty	Severe Difficulty	Severe Difficulty	Moderate Difficulty	Mild Difficulty
16	Control Group	52	Female	10	Uncontrolled	Medication	Yes	No	29.8	25-29.9 (Overweight)	120	Left	Continuous Sharp	13.3	13.3	8	7	6	5	4	3	2	92	98	106	113	127	133	141	15	18	33	41	52	64	76	35	42	57	63	68	74	83	Unable	Unable	Severe Difficulty	Severe Difficulty	Moderate Difficulty	Mild Difficulty
[truncated: 227 more columns]
